# Supplementary material
Source: Springer Nature journal article supplement (https://www.springermedizin.de/resource/supplementary/12885_2013_4620_MOESM1_ESM.pdf/9466918)

**A**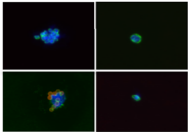**B**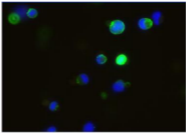**C**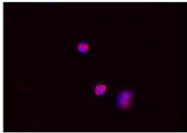

Supplement: MOESM1 [file 9466918]
